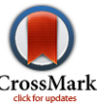

Correction

# Correction: Cancer Mortality by Country of Birth, Sex, and Socioeconomic Position in Sweden, 1961–2009

The PLOS ONE Staff

There is an error in the legend for Figure 3. There are three question marks at the beginning of the legend which should instead be an asterisk. Please see the corrected Figure 3 here.

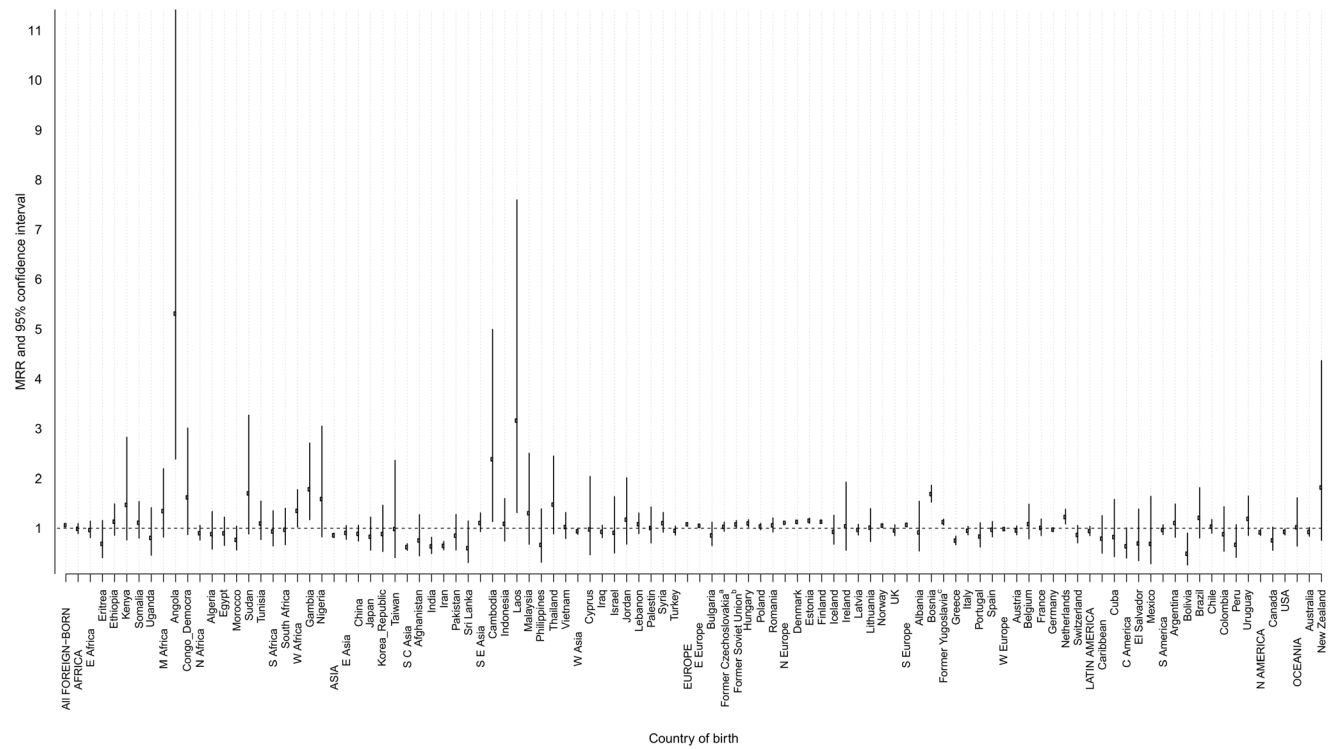

**Figure 3. All-site cancer mortality rate ratio (MRR)\* and 95% confidence interval (CI) among foreign-born men by continent, region, and country of birth compared with Sweden-born men, 1961–2009.** \*Adjusted for age at follow-up and calendar period at baseline. <sup>a</sup>The former Czechoslovakia includes Czechoslovakia, Slovakia, and the Czech Republic. <sup>b</sup>The former Soviet Union includes Belarus, Moldova, Russian Federation, Soviet Union, and Ukraine. <sup>c</sup>The former Yugoslavia includes Yugoslavia, Croatia, Macedonia, Serbia, Slovenia, and Montenegro. doi:10.1371/journal.pone.0093174.g003

Reference

1. Abdoli G, Bottai M, Moradi T (2014) Cancer Mortality by Country of Birth, Sex, and Socioeconomic Position in Sweden, 1961–2009. PLoS ONE 9(3): e93174. doi:10.1371/journal.pone.0093174

**Citation:** The PLOS ONE Staff (2014) Correction: Cancer Mortality by Country of Birth, Sex, and Socioeconomic Position in Sweden, 1961–2009. PLoS ONE 9(8): e106167. doi:10.1371/journal.pone.0106167

**Published** August 13, 2014

**Copyright:** © 2014 The PLOS ONE Staff. This is an open-access article distributed under the terms of the Creative Commons Attribution License, which permits unrestricted use, distribution, and reproduction in any medium, provided the original author and source are credited.
